# Supplementary material
Source: PubMed Central journal article supplement (PMC5541219)
Supplement: AEM.00909-17_zam999117986s1.pdf [file AEM.00909-17_zam999117986s1.pdf]

**Supplementary Figures and Tables for:**

**Novel microbial assemblages dominate weathered sulfide-bearing rock from copper-nickel deposits in the Duluth Complex, Minnesota, USA**

Daniel S. Jones<sup>a,b</sup>, Kim A. Lapakko<sup>c</sup>, Zachary J. Wenz<sup>c</sup>, Michael C. Olson<sup>c</sup>, Elizabeth W. Roepke<sup>a,b</sup>, Michael J. Sadowsky<sup>a</sup>, Paige J. Novak<sup>a,d</sup>, Jake V. Bailey<sup>b</sup>

<sup>a</sup>University of Minnesota, BioTechnology Institute, St. Paul, MN

<sup>b</sup>University of Minnesota, Dept. of Earth Sciences, Minneapolis, MN

<sup>c</sup>Minnesota Department of Natural Resources, Division of Lands and Minerals, St. Paul, MN

<sup>d</sup>University of Minnesota, Dept. of Civil, Environmental, and Geo- Engineering, Minneapolis, MN

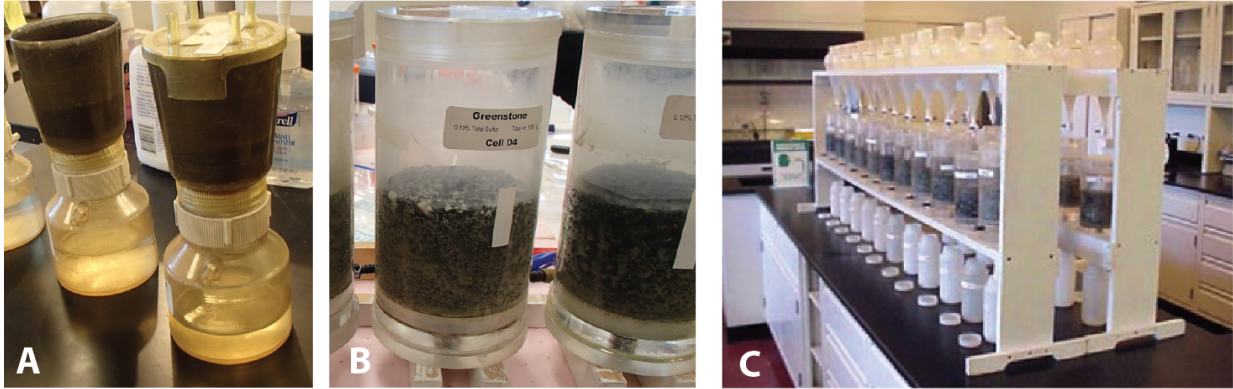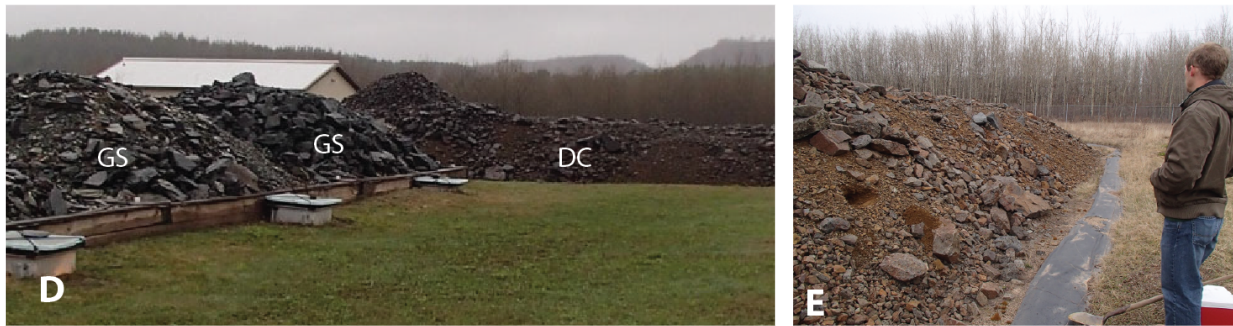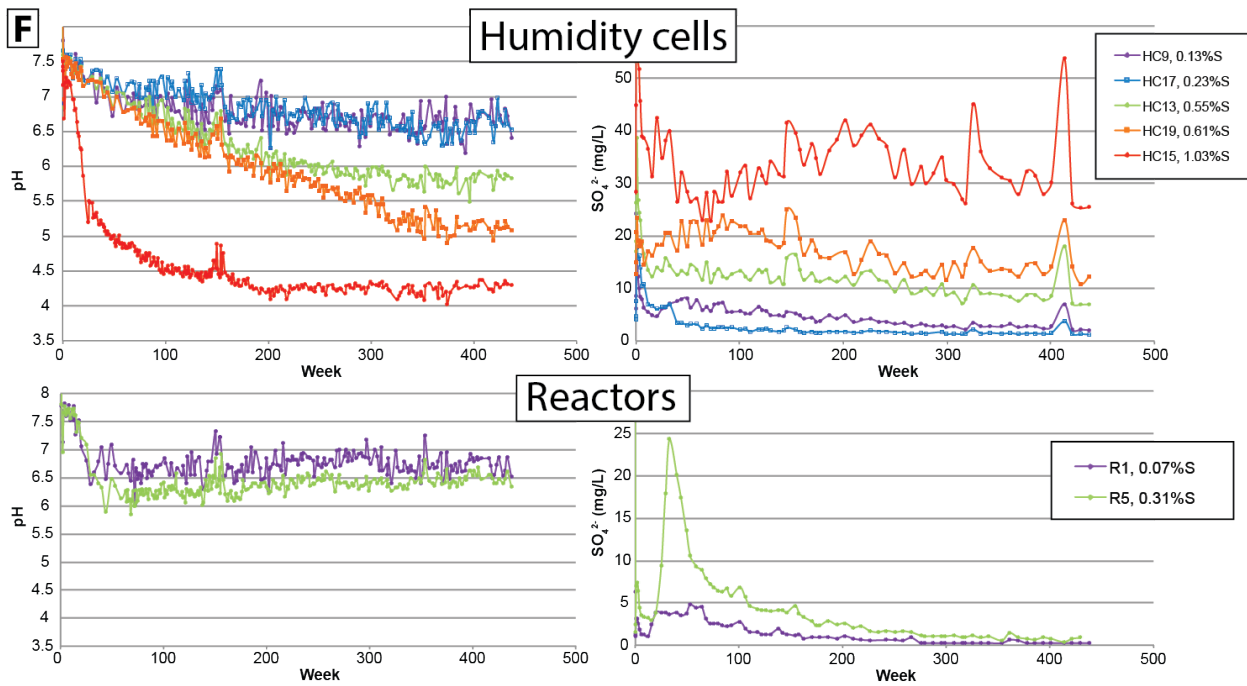

**Supplementary Figure S1.** Representative images of the laboratory and field leaching experiments established by the Minnesota Department of Natural Resources (MN DNR) (A-E). Examples of covered (right) and uncovered (left) reactors are shown in (A), and humidity cells are pictured in (B) and (C). Photo (C) courtesy of the MN DNR Division of Lands and Minerals. Field leaching experiments are shown in panels (D) and (E). In panel (D), two greenstone (GS) piles are in the foreground, left, and the large Duluth Complex (DC) pile is in the background. Panel (E) is a close up of the Duluth Complex pile, Kipp Sande for scale. Panel (F) shows examples of long term data from five of the Duluth Complex humidity cells (top) and two of the

reactors (bottom) that were sampled here. Data through 2011 is shown. Samples for microbiological analysis were collected at the termination of the experiment (Dataset S1). See the MN DNR reports referenced in the table in Dataset S1 for complete geochemical and other information on all the weathering experiments sampled in this study.

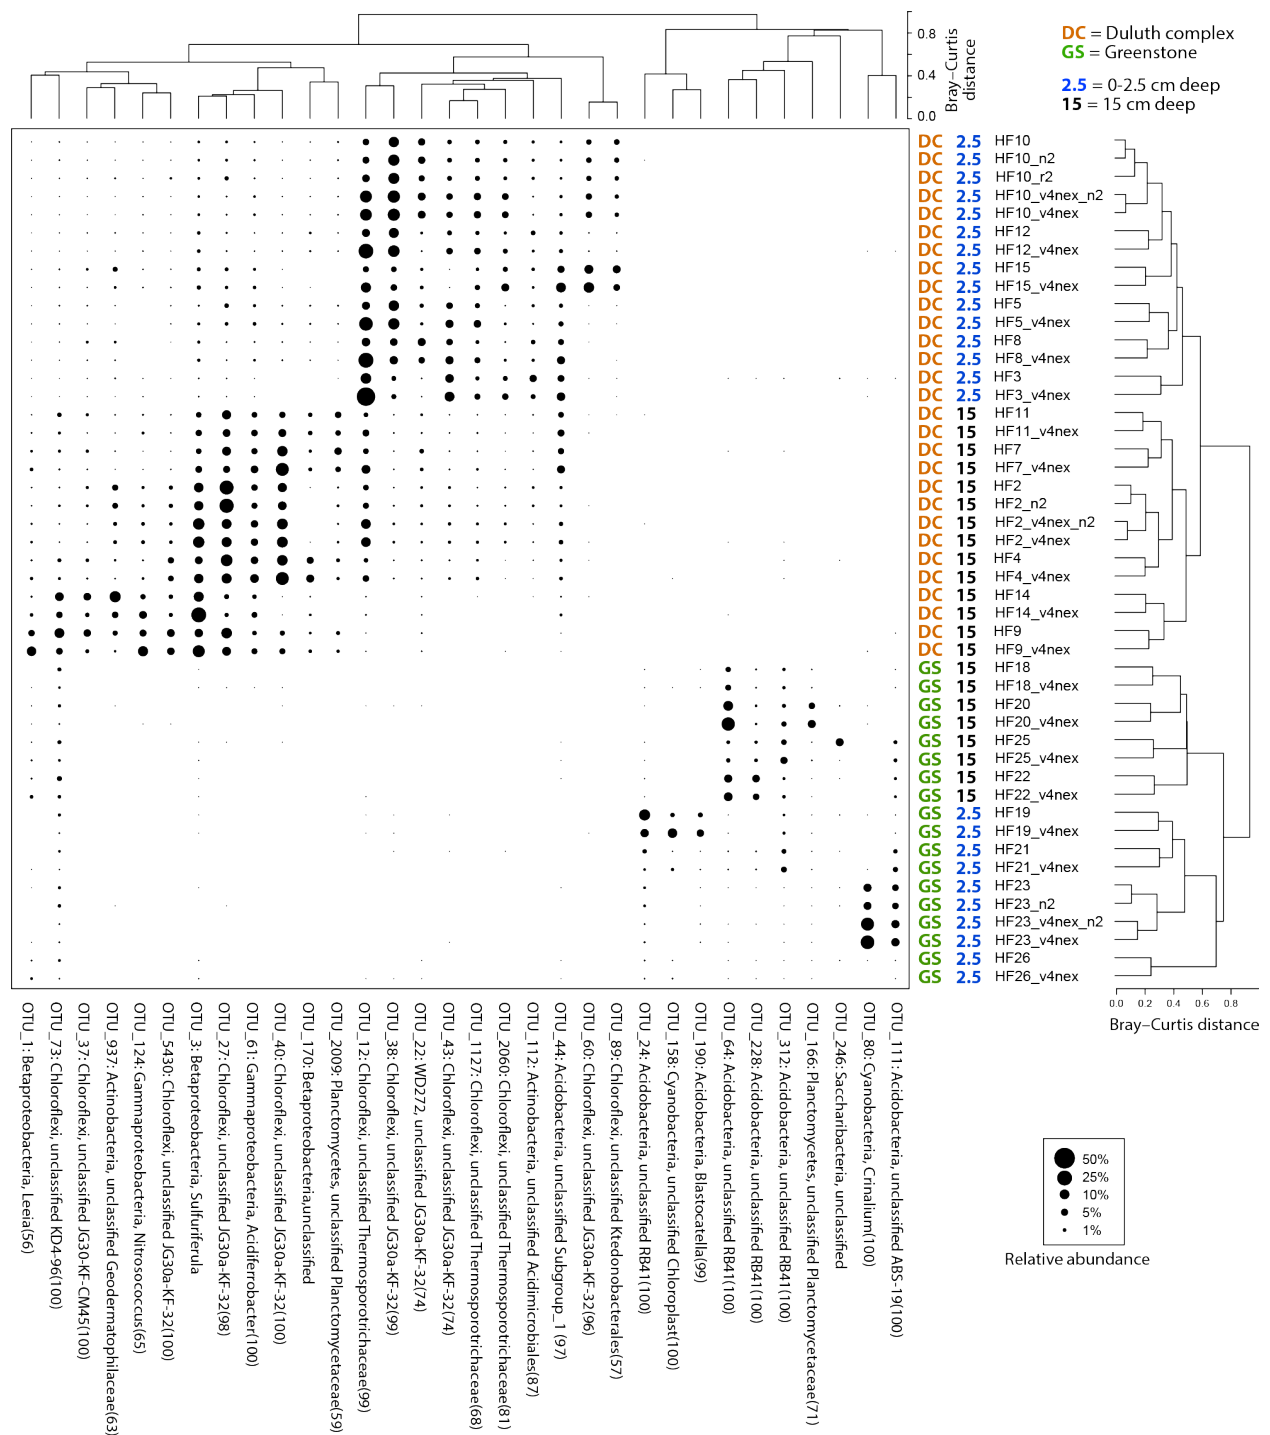

**Supplementary Figure S2.** Two-way cluster analysis of all DNA libraries from field samples. The libraries with “\_v4nex” in the name are the in-house libraries, and the others were generated using the full service amplicon sequencing protocol. Replicates are included to show the variability among libraries. The size of the point scales with the relative abundance of each OTU. The Q-mode cluster analysis was calculated with all OTUs, while R-mode clustering only includes OTUs that were present at >5% in at least one field sample. The taxonomic affiliation of each OTU includes its phylum- and genus-level classifications, if available. OTUs that are unclassified at the genus level are indicated as such, and the highest available taxonomic classification is provided. Confidence scores >50 are provided in parentheses.

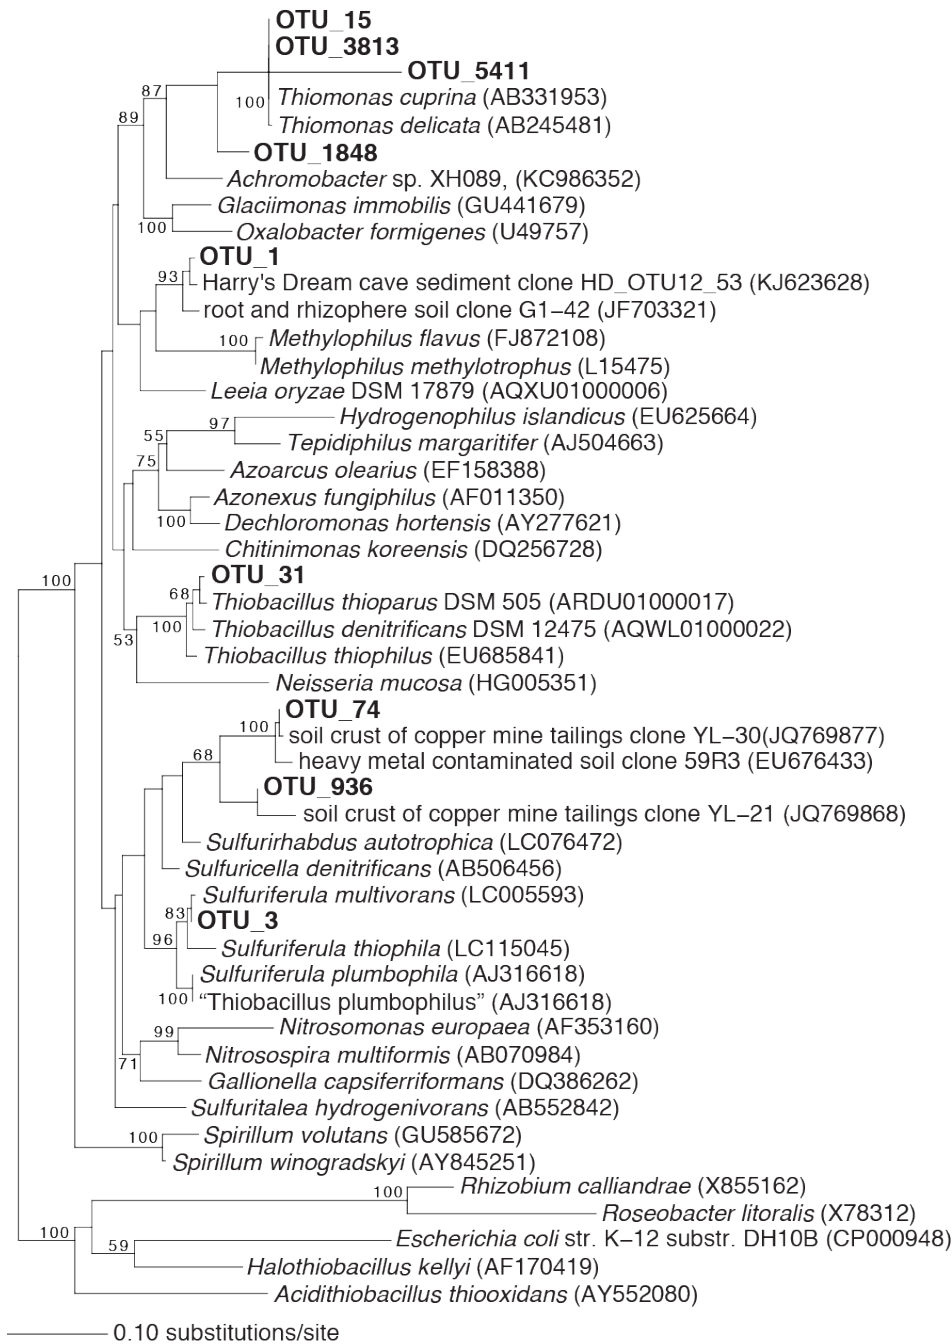

**Supplementary Figure S3.** Phylogenetic tree showing the placement of OTUs that classify as sulfur-oxidizing genera in the *Betaproteobacteria*, as well as one of the most abundant OTUs (OTU\_1) that was unclassified. The base tree is a maximum likelihood phylogram created with nearly full-length sequences, with shorter amplicon sequences (bold) placed after the fact using the EPA algorithm. Numbers indicate bootstrap support for nodes from the maximum likelihood analysis of nearly full-length sequences.

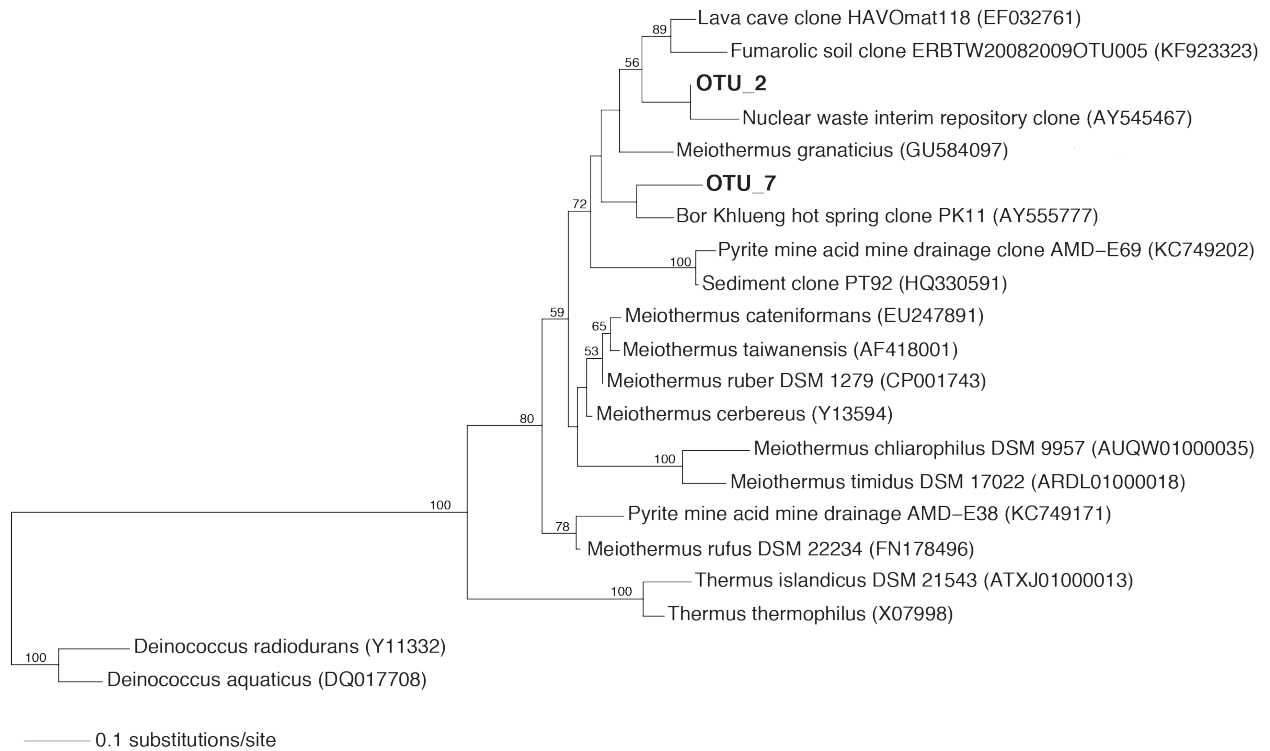

**Supplementary Figure S4.** Phylogenetic tree showing the placement of OTUs classified as *Meiothermus* spp. The base tree is a maximum likelihood phylogram created with nearly full-length sequences, with shorter amplicon sequences (bold) placed after the fact using the EPA algorithm. Numbers indicate bootstrap support for nodes from the maximum likelihood analysis of nearly full-length sequences.

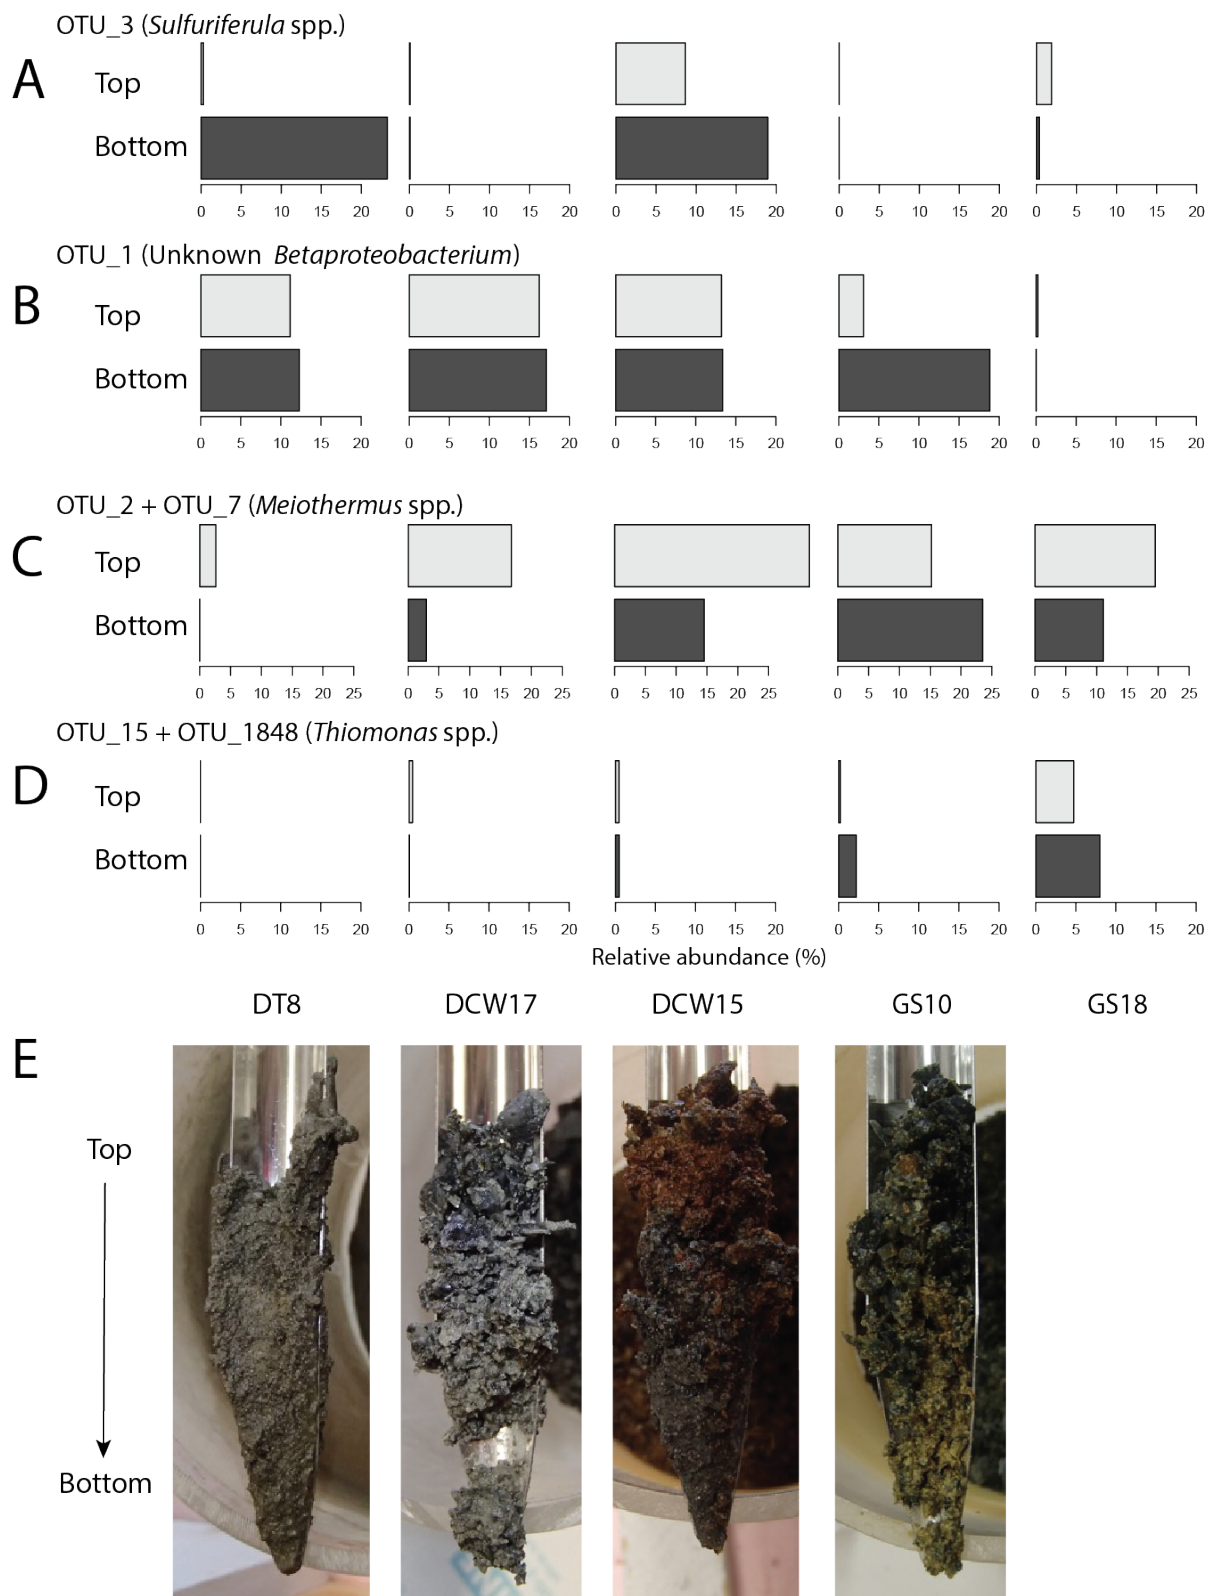

**Supplementary Figure S5.** (A-D) Relative abundance of select abundant OTUs in the surface and deeper layers of five humidity cells. Photos of vertical profiles of the humidity cells are shown in (E). (Photo not available for GS18.) Note that an abrupt redox horizon is apparent in some cells (DWC15) but not in others.





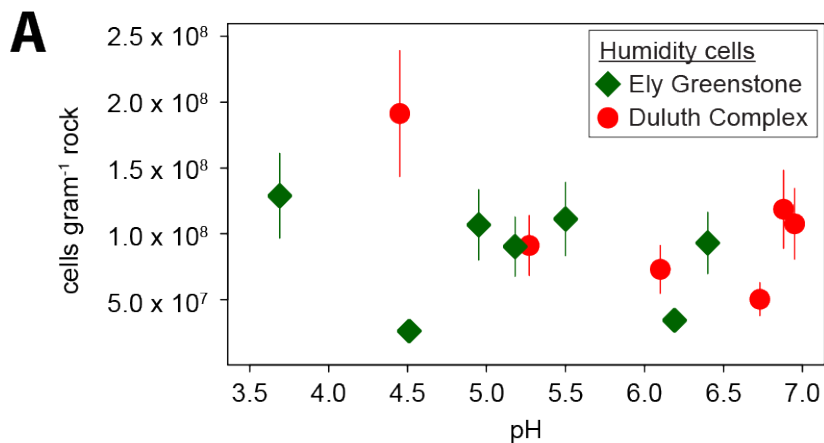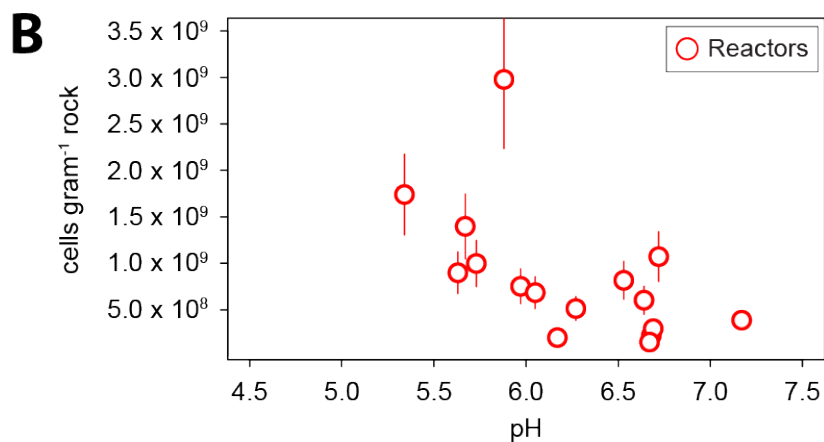

**C**

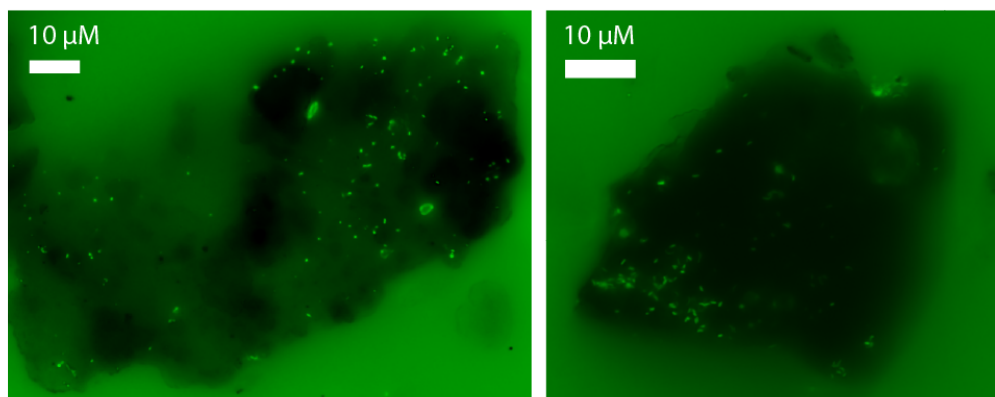

**Supplementary Figure S7.** Cell counts versus pH for humidity cell (A) and reactor (B) samples. pH was not statistically significantly correlated with cell abundance in humidity cells (panel A: Duluth Complex,  $r^2=0.38$ ,  $p=0.19$ ; greenstone,  $r^2=0.08$ ,  $p=0.53$ ) but it was in reactors (panel B:  $r^2=0.32$ ,  $p=0.02$ ). (C) Photomicrographs of CYBR Gold stained cells attached to mineral surfaces in humidity cell samples DCW15 and DCW13, respectively. The vast majority of cells in the experiments were attached to mineral surfaces, and sonication was necessary to detach cells and achieve a homogenous distribution for counting

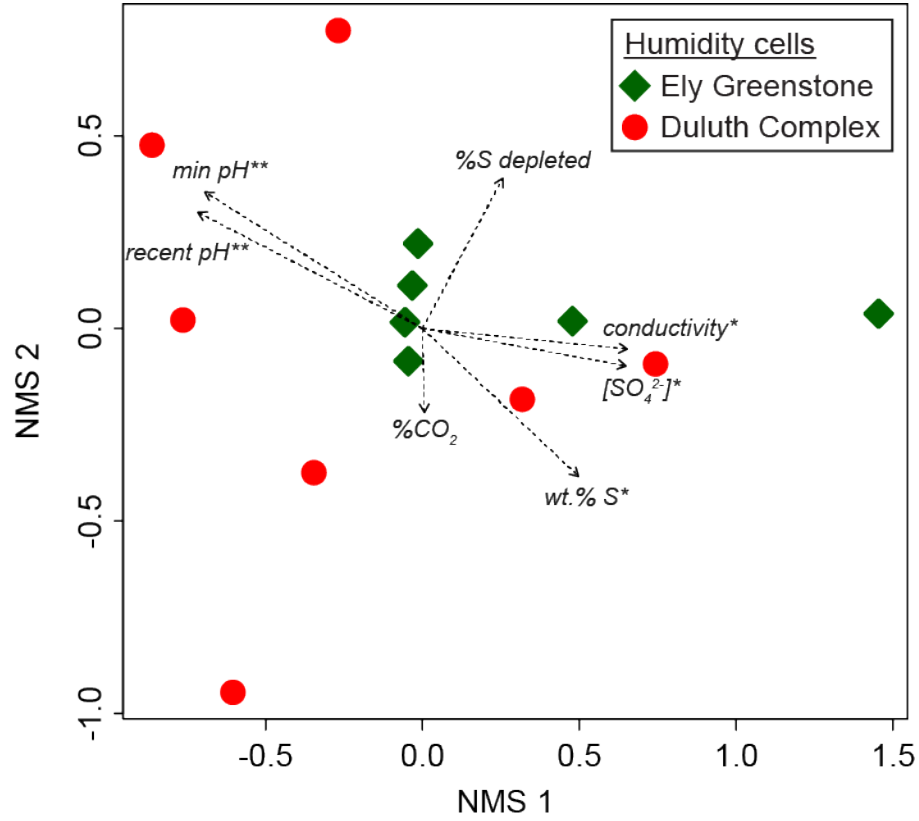

**Supplementary Figure S8.** NMS ordination of 16S rRNA transcript libraries from humidity cells. Fitted vectors of variables indicated by single and double asterisks (\*\*) are statistically significant (\*\* =  $p < 0.001$ ,  $r^2 > 0.8$ ; \* =  $p < 0.02$ ,  $r^2 > 0.5$ ).

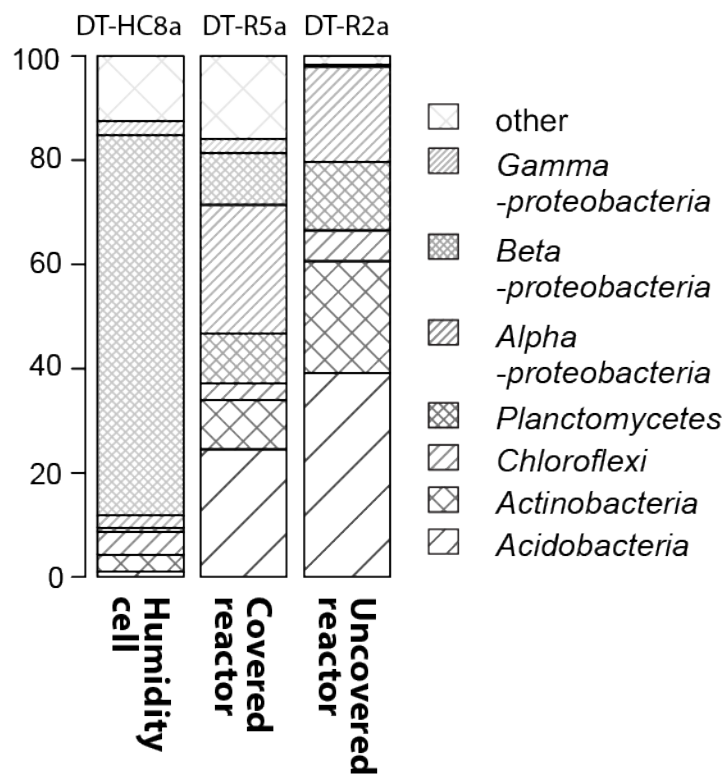

**Supplementary Figure S9.** Phylum-level comparison of libraries from three tailings weathering experiments: a humidity cell (DT\_HC8a), a covered reactor (DT\_R5a), and an uncovered reactor (DT\_R2a). Phyla representing >2% in at least one of the three libraries are shown. These three experiments were all initiated with the same tailings material, and the libraries were all created with the full-service method from RNAlater-preserved samples.

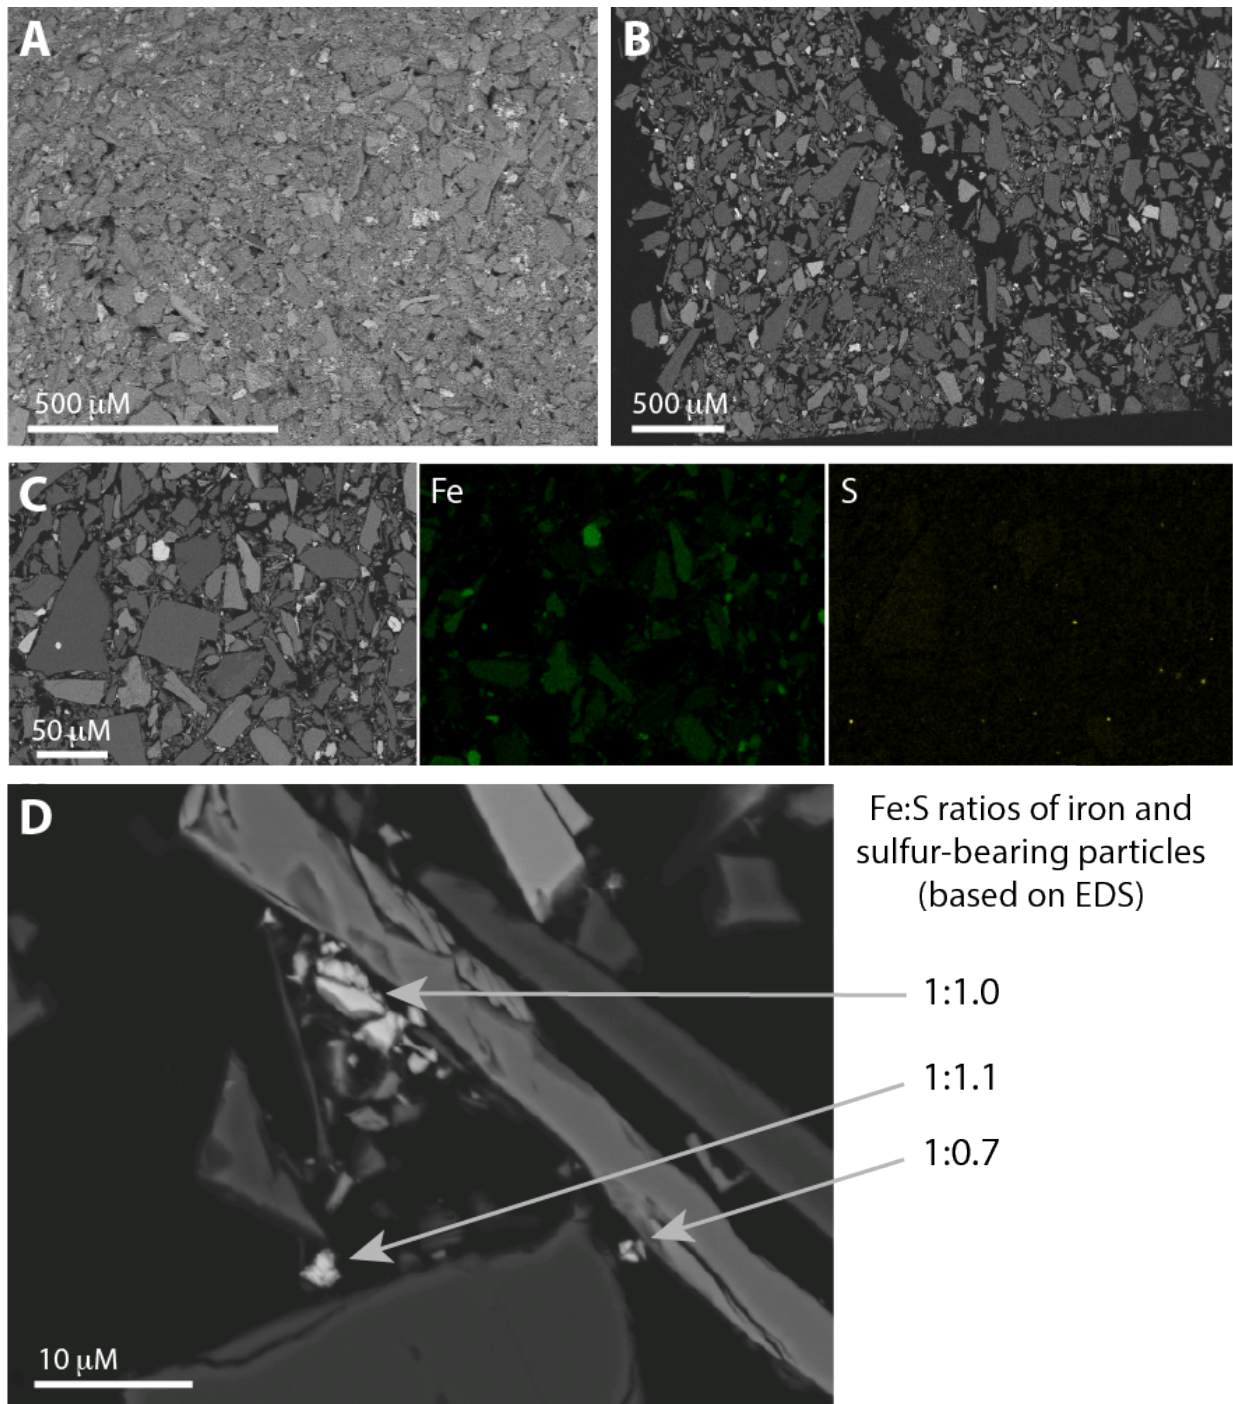

**Supplementary Figure S10.** Representative backscatter (BSE) scanning electron microscopy (SEM) images of weathered tailings from humidity cells. Panel A is an image of loose tailings, and panels B-D are from a thin section created from an epoxy-embedded humidity cell (MN DNR, unpublished). Panel C shows elemental maps for iron and sulfur, collected from the region the BSE image to the left. Panel D is high magnification BSE image from which energy dispersive spectroscopy (EDS) analyses were collected from S-bearing particles (arrows). Iron to sulfur ratios indicate that the iron sulfides are likely pyrrhotite (the elevated iron in the bottom particle may be from the surrounding minerals, because in this case the EDS spot size is large

than the particle). Image A was collected from an uncoated sample with a Hitachi TM-1000 scanning electron microscope (Hitachi, Tokyo, Japan), and the other images were collected with a JEOL JSM-6500F scanning electron microscope, 15 keV accelerating voltage for the EDS analysis, from a carbon-coated thin section.

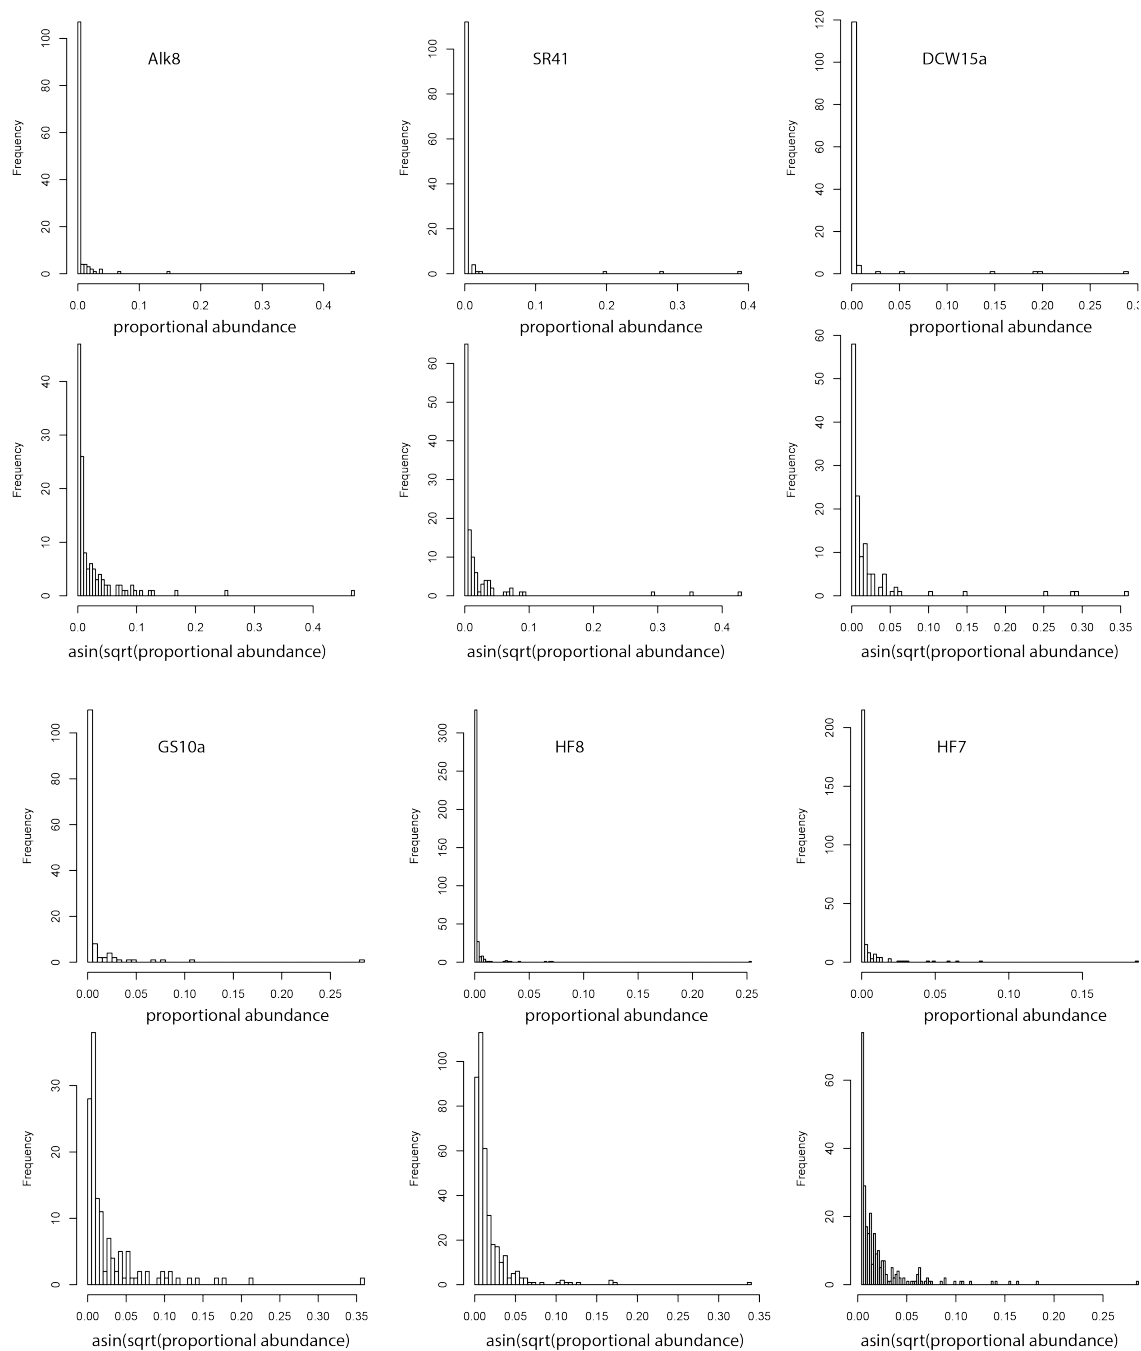

**Supplementary Figure S11.** Histograms depicting the impact of arcsine square root transformation on the structure of the data, for six representative libraries. For each library, untransformed data is in the top panel, transformed data is in the bottom panel.

**Table S1.** Library sizes of blank controls included with the sequencing libraries

| <u>Blank name</u> | <u>library size<sup>a</sup></u> | <u>submission date</u> | <u>Blank type</u>    | <u>Library type</u>                            |
|-------------------|---------------------------------|------------------------|----------------------|------------------------------------------------|
| blankDCW1v4nex    | 17                              | Nov2015                | DNA extraction blank | custom V4 nextera, barcoding only <sup>b</sup> |
| blankDCW2v4nex    | 14                              | Nov2015                | DNA extraction blank | custom V4 nextera, barcoding only <sup>b</sup> |
| blankHF1v4nex     | 13                              | Nov2015                | DNA extraction blank | custom V4 nextera, barcoding only <sup>b</sup> |
| blankHF2v4nex     | 5                               | Nov2015                | DNA extraction blank | custom V4 nextera, barcoding only <sup>b</sup> |
| BLANK1_S64_L001   | 494                             | Oct2014                | Water blank          | Full service                                   |
| BLANK2_S8_L001    | 1289 <sup>c</sup>               | Oct2014                | Water blank          | Full service                                   |
| H20-BLANK-002-A   | 4                               | Nov2015                | Water blank          | Full service                                   |
| H20-BLANK-002-H   | 6                               | Nov2015                | Water blank          | Full service                                   |
| H20-BLANK-H06_S   | 30                              | Nov2015                | Water blank          | Full service                                   |
| H20-BLANK-1_S30   | 183                             | Oct2014                | Water blank          | Full service                                   |
| H20-BLANK-2_S40   | 48                              | Oct2014                | Water blank          | Full service                                   |
| H20-BLANK-3_S50   | 53                              | Oct2014                | Water blank          | Full service                                   |
| H20-BLANK-4_S60   | 40                              | Oct2014                | Water blank          | Full service                                   |
| H20-BLANK-5_S70   | 69                              | Oct2014                | Water blank          | Full service                                   |
| H20-BLANK-6_S80   | 94                              | Oct2014                | Water blank          | Full service                                   |

<sup>a</sup>Library size is the number of sequences that remained following quality trimming, filtering, and OTU calling

<sup>b</sup>DNA extraction blanks were amplified using the custom V4 nextera primers (no visible PCR product) and submitted for "barcoding only" like the other custom V4 nextera libraries.

<sup>c</sup>Most of the sequences in this blank were from two OTUs, classified as the genera *Anaerococcus* and *Staphylococcus*
